# Supplementary material
Source: publisher figshare collection journal article supplement (https://acs.figshare.com/ndownloader/files/22773098)
Supplement: Supplementary file 1 [file 22773098]

# Optical Limiting Based on Huygens Metasurfaces

*Austin Howes<sup>1†</sup>, Zhihua Zhu<sup>2†</sup>, David Curie<sup>1</sup>, Jason R. Avila<sup>3</sup>, Virginia D. Wheeler<sup>3</sup>, Richard F.*

*Haglund<sup>1</sup>, and Jason G. Valentine<sup>4\*</sup>*

<sup>1</sup>Department of Physics and Astronomy, Vanderbilt University, Nashville, TN 37212, USA

<sup>2</sup>Department of Electrical Engineering and Computer Science, Vanderbilt University, Nashville, TN 37212, USA

<sup>3</sup>U.S. Naval Research Laboratory, Washington, DC 20375, USA

<sup>4</sup>Department of Mechanical Engineering, Vanderbilt University, Nashville, TN 37212, USA

<sup>†</sup>These authors contributed equally to the work

\*Corresponding author: [jason.g.valentine@vanderbilt.edu](mailto:jason.g.valentine@vanderbilt.edu)

## SUPPLEMENTARY INFORMATION:

Table 1: Thermal properties of materials in the Huygens metasurface-based optical limiter design.

| Material               | Density (g/cm <sup>3</sup> ) | Thermal Cond. W/K · m | Heat Capacity (kJ/K · kg) |
|------------------------|------------------------------|-----------------------|---------------------------|
| Si                     | 2.328                        | 1.5                   | 0.71                      |
| SiO <sub>2</sub>       | 2.4                          | 1.4                   | 0.75                      |
| VO <sub>2</sub> (25°C) | 4.57                         | 3.5                   | 0.656                     |
| VO <sub>2</sub> (85°C) | 4.64                         | 6                     | 0.78                      |
